# Supplementary material for: Applying sequential pattern mining to investigate cerebrovascular health outpatients’ re-visit patterns
Source: PeerJ journal article supplement (doi:10.7717/peerj.5183), 2018-07-09
Supplement: Supplemental_Figures.pdf [file Supplemental_Figures.pdf]

| Merging Group of 2-visits Data Records |                 |                       |           |             |                  |                 |             |                       |          |             |     |
|----------------------------------------|-----------------|-----------------------|-----------|-------------|------------------|-----------------|-------------|-----------------------|----------|-------------|-----|
| Initial Group ID                       | Merged Group_ID | Group Characteristics |           |             | Initial Group ID | Merged Group_ID |             | Group Characteristics |          |             |     |
|                                        |                 | Age                   | BP Hist.  | Diab. Hist. |                  | Iteration 1     | Iteration 2 | Age                   | BP Hist. | Diab. Hist. |     |
| 131 (II-23)                            |                 | Age3                  | No        | No          | 7 (II-4)         | II-38           | II-43       | Age1                  | No       | Yes         |     |
| 195 (II-5)                             | II-37           | Age1                  | No        | No          | 8 (II-13)        |                 |             | II-43                 | Age2     | No          | Yes |
| 9 (II-9)                               |                 | Age1                  | Unchecked | Unchecked   | 9 (II-22)        |                 |             |                       | Age3     | No          | Yes |
| 152 (II-14)                            | II-39           | Age2                  | No        | No          | 19 (II-28)       | II-44           | Age4        | Yes                   | Yes      |             |     |
| 9 (II-18)                              |                 | Age2                  | Unchecked | Unchecked   | 10 (II-31)       |                 | Age4        | No                    | Yes      |             |     |
| 7 (II-27)                              | II-40           | Age3                  | Unchecked | Unchecked   | 55 (II-11)       | II-42           | II-45       | Age2                  | Yes      | No          |     |
| 88 (II-32)                             |                 | Age4                  | No        | No          | 59 (II-20)       |                 |             | Age3                  | Yes      | No          |     |
| 78 (II-29)                             | II-41           | Age4                  | Yes       | No          | 25 (II-2)        |                 |             | Age1                  | Yes      | No          |     |
| 11 (II-36)                             |                 | Age4                  | Unchecked | Unchecked   | 8 (II-19)        | II-46           | Age3        | Yes                   | Yes      |             |     |
|                                        |                 |                       |           |             | 5 (II-10)        |                 | Age2        | Yes                   | Yes      |             |     |

Notes:

----- Chosen Representative Characteristics

Figure S1. Group Merging Process for 2-visits Data Records

| Merging Group of 3-visits Data Records |                 |             |                       |             |             |                       |                 |             |                       |          |             |
|----------------------------------------|-----------------|-------------|-----------------------|-------------|-------------|-----------------------|-----------------|-------------|-----------------------|----------|-------------|
| Initial Group ID                       | Merged Group_ID |             | Group Characteristics |             |             | Initial Group ID      | Merged Group_ID |             | Group Characteristics |          |             |
|                                        | Iteration 1     | Iteration 2 | Age                   | BP Hist.    | Diab. Hist. |                       | Iteration 1     | Iteration 2 | Age                   | BP Hist. | Diab. Hist. |
| 11                                     | III-23          |             | Age3                  | No          | No          | 24                    | III-14          | III-53      | Age2                  | No       | No          |
| 11                                     | III-29          |             | Age4                  | Yes         | No          | 3                     | III-51          |             | Age4                  | No → Yes | No          |
| 1                                      | III-38          | III-55      | Age1                  | No → Yes    | No          | 16                    | III-32          | III-59      | Age4                  | No       | No          |
| 3                                      | III-44          |             | Age2                  | No → Yes    | No          | 6                     | III-49          | III-68      | Age3→4                | No       | No          |
| 24                                     | III-5           | III-60      | Age1                  | No          | No          | 1                     | III-13          |             | Age2                  | No       | Yes         |
| 6                                      | III-2           | III-54      | Age1                  | Yes         | No          |                       |                 |             |                       |          |             |
| 12                                     | III-11          | III-72      | Age2                  | Yes         | No          |                       |                 |             |                       |          |             |
| 1                                      | III-47          |             | Age3→4                | Yes         | Yes         |                       |                 |             |                       |          |             |
| Initial Group ID                       | Merged Group_ID |             |                       |             |             | Group Characteristics |                 |             |                       |          |             |
|                                        | Iteration 1     | Iteration 2 | Iteration 3           | Iteration 4 | Iteration 5 | Age                   | BP Hist.        | Diab. Hist. |                       |          |             |
| 6                                      | III-39          | III-52      |                       |             |             | Age1→2                | No              | No          |                       |          |             |
| 9                                      | III-46          |             | III-56                |             |             | Age2→3                | No              | No          |                       |          |             |
| 1                                      | III-42          |             |                       | III-57      |             | Age2                  | No → Yes        | Yes         |                       |          |             |
| 2                                      | III-48          |             |                       |             | III-66      | Age3                  | No → Yes        | No          |                       |          |             |
| 1                                      | III-1           |             |                       |             |             | Age1                  | Yes             | Yes         |                       |          |             |
| 2                                      | III-19          | III-62      |                       |             |             | Age3                  | Yes             | Yes         |                       |          |             |
| 1                                      | III-50          |             | III-65                |             |             | Age4                  | No → Yes        | Yes         |                       |          |             |
| 2                                      | III-4           |             |                       | III-67      |             | Age1                  | No              | Yes         |                       |          |             |
| 1                                      | III-43          |             |                       |             | III-71      | Age2→3                | No → Yes        | Yes         |                       |          |             |
| 2                                      | III-31          | III-58      |                       |             |             | Age4                  | No              | Yes         |                       |          |             |
| 1                                      | III-40          |             | III-64                |             |             | Age2→3                | Yes             | Yes         |                       |          |             |
| 10                                     | III-20          | III-63      |                       |             |             | Age3                  | No              | Yes         |                       |          |             |
| 3                                      | III-41          |             |                       | III-69      |             | Age4                  | Yes             | Yes         |                       |          |             |
| 1                                      | III-22          |             |                       |             | III-70      | Age1→2                | Yes             | Yes         |                       |          |             |
| 2                                      | III-28          | III-61      |                       |             |             | Age2→3                | No              | No → Yes    |                       |          |             |
| 1                                      | III-37          |             |                       |             |             |                       |                 |             |                       |          |             |

Notes:  
 ----- Chosen Representative Characteristics

Figure S2. Group Merging Process for 3-visits Data Records
